# Supplementary material
Source: HighWire-hosted journal article supplement (https://gut.bmj.com/content/68/4/654)
Supplement: inline-supplementary-material-3 [file inline-supplementary-material-3.xls]

## Sheet: Supplementary table 2
Supplementary table 2: Differentially abundant fungal taxa at class level (MaAsLin)
Variable	Feature	Value	Coefficient	P.value	Q.value
Diagnosis	d__Eukaryota|k__Fungi|p__Ascomycota|c__Pneumocystidomycetes	DiagnosisControl	0.0108612	0.00797232	0.168937
Diagnosis	d__Eukaryota|k__Fungi|p__Ascomycota|c__Saccharomycetes	DiagnosisControl	0.00530831	0.00431581	0.120033
Diagnosis	d__Eukaryota|k__Fungi|p__Basidiomycota|c__Malasseziomycetes	DiagnosisControl	-0.0174909	2.82e-06	0.00109216
