# Supplementary material
Source: HighWire-hosted journal article supplement (https://gut.bmj.com/content/68/4/654)
Supplement: inline-supplementary-material-4 [file inline-supplementary-material-4.xls]

## Sheet: Supplementary table 3
Supplementary table 3: Differentially abundant fungal taxa at family level (MaAsLin)
Variable	Feature	Value	Coefficient	P.value	Q.value
Diagnosis	d__Eukaryota|k__Fungi|p__Basidiomycota|c__Malasseziomycetes|o__Malasseziales|f__Malasseziaceae	DiagnosisControl	-0.00925317	5.4e-06	0.00867934
Diagnosis	d__Eukaryota|k__Fungi|p__Basidiomycota|c__Agaricomycetes|o__Boletales|f__Pisolithaceae	DiagnosisControl	-0.00626311	0.000800809	0.164912
Diagnosis	d__Eukaryota|k__Fungi|p__Basidiomycota|c__Agaricomycetes|o__Agaricales|f__Marasmiaceae	DiagnosisControl	-0.00868968	0.000333891	0.116838
Diagnosis	d__Eukaryota|k__Fungi|p__Ascomycota|c__Sordariomycetes|o__Sordariales|f__Chaetomiaceae	DiagnosisControl	-0.00419443	0.000105743	0.0715354
Diagnosis	d__Eukaryota|k__Fungi|p__Ascomycota|c__Leotiomycetes|f__Pseudeurotiaceae	DiagnosisControl	-0.00317771	0.00299211	0.224907
Diagnosis	d__Eukaryota|k__Fungi|p__Ascomycota|c__Leotiomycetes|o__Erysiphales|f__Erysiphaceae	DiagnosisControl	-0.00813909	0.000853202	0.164912
Diagnosis	d__Eukaryota|k__Fungi|p__Ascomycota|c__Saccharomycetes|o__Saccharomycetales|f__Lipomycetaceae	DiagnosisControl	0.00685841	0.00222581	0.200768
