# Supplementary material
Source: HighWire-hosted journal article supplement (https://gut.bmj.com/content/68/4/654)
Supplement: inline-supplementary-material-9 [file inline-supplementary-material-9.docx]

**Figure Legends for Supplementary Figures**

**Supplementary figure 1**. A: Multivariate redundancy analysis of enteric bacterial compositional profile stratifying CRC patients from control. Control; n=92, CRC; n=73. RDA1 and RDA2 represent the top two coordinates that reflects most of the diversity, given as a percentage. Groups were compared using Mann-Whitney U test. B: Chao1 and Fishers’ alpha diversity indices were significantly different between CR**C** and control Control; n=92, CRC; n=73: Mann-Whitney U test * *P*<0.05. C: Phylum Fusobacteria was significantly enriched while and phylum Firmicutes was depleted in CRC compared to control. Control; n=92, CRC; n=73, Mann-Whitney U test * *P*<0.05.

**Supplementary figure 2**. Rarefaction plot showing enteric fungal species richness in CRC and control.

**Supplementary figure 3.** Ecological network of differentially abundant fungi in CRC and control.
