# Supplementary material
Source: HighWire-hosted journal article supplement (https://gut.bmj.com/content/68/4/654)
Supplement: inline-supplementary-material-10 [file inline-supplementary-material-10.docx]

Supplementary table 6

Differential ecological network in control and CRC at family taxonomic level in discovery cohort.

Differential bacterial-fungal inter-kingdom co-exclusive interactions in control and CRC

| Diagnosis | Correlation coefficients > 0.2 | Correlation coefficients < -0.2 | P value |
| --- | --- | --- | --- |
| Control | 1514 | 4633 | <0.00001 |
| CRC | 710 | 7500 |

| Diagnosis | Correlation coefficients >0.3 | Correlation coefficients < -0.3 | P value |
| --- | --- | --- | --- |
| Control | 525 | 601 | <0.00001 |
| CRC | 203 | 2819 |

| Diagnosis | Correlation coefficients >0.4 | Correlation coefficients < -0.4 | P value |
| --- | --- | --- | --- |
| Control | 150 | 13 | <0.00001 |
| CRC | 29 | 580 |

| Diagnosis | Correlation coefficients >0.5 | Correlation coefficients < -0.5 | P value |
| --- | --- | --- | --- |
| Control | 20 | - | NA |
| CRC | 4 | 71 |

Differential intra-fungal co-occurrence interactions in control and CRC

| Diagnosis | Correlation coefficients >0.2 | Correlation coefficients < -0.2 | P value |
| --- | --- | --- | --- |
| Control | 587 | 162 | <0.00001 |
| CRC | 1654 | 56 |

| Diagnosis | Correlation coefficients >0.3 | Correlation coefficients < -0.3 | P value |
| --- | --- | --- | --- |
| Control | 39 | 8 | <0.00001 |
| CRC | 549 | 7 |

| Diagnosis | Correlation coefficients >0.4 | Correlation coefficients < -0.4 | P value |
| --- | --- | --- | --- |
| Control | 5 | - | NA |
| CRC | 166 | - |

| Diagnosis | Correlation coefficients >0.5 | Correlation coefficients < -0.5 | P value |
| --- | --- | --- | --- |
| Control | 2 | - | NA |
| CRC | 59 | - |

Fisher’s exact test was performed to compare the ratio of significant co-occurrence and co-excluding correlation coefficients (>0.2 or < -0.2, >0.3 or < -0.3, >0.4 or < -0.4, >0.5 or < -0.5. FDR < 0.05). Control; n=92, CRC; n=73
