# Supplementary material
Source: HighWire-hosted journal article supplement (https://gut.bmj.com/content/68/4/654)
Supplement: inline-supplementary-material-21 [file inline-supplementary-material-21.xls]

## Sheet: Suplementary table 17
Supplementary table 17: Correlations within fungal familes in European cohort V2_Control
OtuId_1	OtuId_2	Correlation_coefficient	P_value	Q_value
Otu322	Otu326	0.643817	1.66115e-07	2.17782e-06
Otu319	Otu438	0.503222	1.66115e-07	2.17782e-06
Otu320	Otu322	0.414835	1.66115e-07	2.17782e-06
Otu361	Otu440	0.406841	1.66115e-07	2.17782e-06
Otu361	Otu374	0.399361	0.002	0.0194598
Otu333	Otu361	0.384525	1.66115e-07	2.17782e-06
Otu371	Otu438	0.370484	1.66115e-07	2.17782e-06
Otu344	Otu346	0.36954	1.66115e-07	2.17782e-06
Otu344	Otu440	0.365133	1.66115e-07	2.17782e-06
Otu344	Otu371	0.364168	1.66115e-07	2.17782e-06
Otu327	Otu328	0.363244	0.004	0.0329693
Otu331	Otu371	0.361976	1.66115e-07	2.17782e-06
Otu322	Otu328	0.346608	0.002	0.0194598
Otu340	Otu384	0.342523	1.66115e-07	2.17782e-06
Otu326	Otu328	0.342308	1.66115e-07	2.17782e-06
Otu361	Otu409	0.340468	1.66115e-07	2.17782e-06
Otu327	Otu337	0.338063	0.002	0.0194598
Otu404	Otu440	0.330895	1.66115e-07	2.17782e-06
Otu326	Otu348	0.325638	1.66115e-07	2.17782e-06
Otu340	Otu450	0.323706	1.66115e-07	2.17782e-06
Otu342	Otu445	0.323586	1.66115e-07	2.17782e-06
Otu374	Otu378	0.320338	1.66115e-07	2.17782e-06
Otu328	Otu337	0.318407	0.002	0.0194598
Otu342	Otu351	0.316013	0.002	0.0194598
Otu322	Otu348	0.314671	1.66115e-07	2.17782e-06
Otu323	Otu327	0.314516	0.006	0.0441253
Otu316	Otu323	0.314057	1.66115e-07	2.17782e-06
Otu322	Otu337	0.313084	0.006	0.0441253
Otu306	Otu419	0.31232	1.66115e-07	2.17782e-06
Otu361	Otu378	0.311048	0.002	0.0194598
Otu361	Otu371	0.310463	1.66115e-07	2.17782e-06
Otu325	Otu347	0.308994	1.66115e-07	2.17782e-06
Otu320	Otu326	0.307003	1.66115e-07	2.17782e-06
Otu339	Otu404	0.30366	1.66115e-07	2.17782e-06
Otu438	Otu452	0.300247	0.004	0.0329693
Otu333	Otu378	0.299983	0.004	0.0329693
Otu333	Otu440	0.294229	0.004	0.0329693
Otu344	Otu361	0.293841	0.002	0.0194598
Otu346	Otu396	0.28881	1.66115e-07	2.17782e-06
Otu319	Otu341	0.288136	0.006	0.0441253
Otu324	Otu445	0.287557	0.002	0.0194598
Otu344	Otu395	0.287153	0.004	0.0329693
Otu323	Otu337	0.286898	0.002	0.0194598
Otu341	Otu348	0.286224	1.66115e-07	2.17782e-06
Otu364	Otu440	0.28363	1.66115e-07	2.17782e-06
Otu319	Otu451	0.282555	0.006	0.0441253
Otu440	Otu442	0.280021	0.002	0.0194598
Otu337	Otu409	0.276607	0.004	0.0329693
Otu346	Otu409	0.274925	0.004	0.0329693
Otu366	Otu377	0.273349	1.66115e-07	2.17782e-06
Otu319	Otu448	0.27184	0.004	0.0329693
Otu346	Otu440	0.271701	0.006	0.0441253
Otu371	Otu409	0.271112	1.66115e-07	2.17782e-06
Otu331	Otu339	0.271055	1.66115e-07	2.17782e-06
Otu320	Otu436	0.268747	1.66115e-07	2.17782e-06
Otu365	Otu444	0.266449	0.006	0.0441253
Otu313	Otu437	0.262649	1.66115e-07	2.17782e-06
Otu344	Otu404	0.262642	1.66115e-07	2.17782e-06
Otu320	Otu348	0.261766	1.66115e-07	2.17782e-06
Otu371	Otu442	0.259957	0.002	0.0194598
Otu383	Otu396	0.259441	1.66115e-07	2.17782e-06
Otu339	Otu371	0.259106	0.002	0.0194598
Otu410	Otu420	0.258042	1.66115e-07	2.17782e-06
Otu326	Otu340	0.257733	0.002	0.0194598
Otu324	Otu332	0.255423	0.002	0.0194598
Otu357	Otu445	0.255058	0.004	0.0329693
Otu366	Otu378	0.253516	0.006	0.0441253
Otu331	Otu404	0.250074	1.66115e-07	2.17782e-06
Otu319	Otu348	0.247705	0.002	0.0194598
Otu384	Otu450	0.247341	0.004	0.0329693
Otu331	Otu344	0.244664	0.004	0.0329693
Otu324	Otu336	0.243765	0.004	0.0329693
Otu339	Otu450	0.243165	1.66115e-07	2.17782e-06
Otu369	Otu405	0.242148	1.66115e-07	2.17782e-06
Otu340	Otu401	0.238912	1.66115e-07	2.17782e-06
Otu368	Otu377	0.23716	1.66115e-07	2.17782e-06
Otu339	Otu377	0.236877	1.66115e-07	2.17782e-06
Otu371	Otu404	0.236455	0.006	0.0441253
Otu340	Otu359	0.233336	0.006	0.0441253
Otu366	Otu390	0.233038	0.006	0.0441253
Otu346	Otu404	0.232314	0.002	0.0194598
Otu324	Otu362	0.23121	0.002	0.0194598
Otu317	Otu326	0.23106	1.66115e-07	2.17782e-06
Otu304	Otu451	0.230693	0.004	0.0329693
Otu387	Otu445	0.229783	0.006	0.0441253
Otu397	Otu423	0.228694	1.66115e-07	2.17782e-06
Otu404	Otu409	0.228609	1.66115e-07	2.17782e-06
Otu323	Otu336	0.227599	0.006	0.0441253
Otu375	Otu381	0.224836	1.66115e-07	2.17782e-06
Otu339	Otu444	0.223686	0.004	0.0329693
Otu359	Otu391	0.223672	0.002	0.0194598
Otu404	Otu420	0.222044	1.66115e-07	2.17782e-06
Otu405	Otu434	0.220959	0.002	0.0194598
Otu318	Otu402	0.22081	1.66115e-07	2.17782e-06
Otu347	Otu362	0.219624	0.004	0.0329693
Otu331	Otu447	0.219516	0.006	0.0441253
Otu306	Otu394	0.219411	0.002	0.0194598
Otu327	Otu405	0.21915	0.006	0.0441253
Otu326	Otu436	0.218861	0.004	0.0329693
Otu324	Otu446	0.218483	0.002	0.0194598
Otu320	Otu434	0.217814	0.004	0.0329693
Otu304	Otu445	0.217744	0.002	0.0194598
Otu308	Otu318	0.211134	1.66115e-07	2.17782e-06
Otu426	Otu432	0.210614	1.66115e-07	2.17782e-06
Otu316	Otu369	0.209943	0.004	0.0329693
Otu382	Otu384	0.208563	0.002	0.0194598
Otu321	Otu361	0.208253	0.004	0.0329693
Otu332	Otu373	0.206757	0.002	0.0194598
Otu329	Otu437	0.206302	1.66115e-07	2.17782e-06
Otu335	Otu357	0.204976	1.66115e-07	2.17782e-06
Otu318	Otu320	0.204842	0.002	0.0194598
Otu433	Otu434	0.204613	0.002	0.0194598
Otu324	Otu430	0.201913	1.66115e-07	2.17782e-06
Otu321	Otu404	0.201554	1.66115e-07	2.17782e-06
Otu323	Otu389	0.200118	1.66115e-07	2.17782e-06
Otu307	Otu342	0.19958	0.006	0.0441253
Otu354	Otu358	0.19775	1.66115e-07	2.17782e-06
Otu373	Otu403	0.197611	1.66115e-07	2.17782e-06
Otu369	Otu373	0.197475	0.004	0.0329693
Otu369	Otu426	0.196293	0.004	0.0329693
Otu384	Otu389	0.195818	0.002	0.0194598
Otu318	Otu352	0.195718	1.66115e-07	2.17782e-06
Otu334	Otu437	0.194692	1.66115e-07	2.17782e-06
Otu316	Otu426	0.193185	0.002	0.0194598
Otu317	Otu443	0.191588	0.004	0.0329693
Otu332	Otu405	0.190942	0.006	0.0441253
Otu354	Otu447	0.19093	0.006	0.0441253
Otu317	Otu318	0.190905	1.66115e-07	2.17782e-06
Otu413	Otu438	0.190805	1.66115e-07	2.17782e-06
Otu359	Otu453	0.190798	0.006	0.0441253
Otu318	Otu348	0.190261	1.66115e-07	2.17782e-06
Otu402	Otu423	0.189952	1.66115e-07	2.17782e-06
Otu358	Otu414	0.189866	1.66115e-07	2.17782e-06
Otu341	Otu349	0.189706	1.66115e-07	2.17782e-06
Otu305	Otu425	0.189372	1.66115e-07	2.17782e-06
Otu340	Otu433	0.188096	0.006	0.0441253
Otu318	Otu340	0.187577	1.66115e-07	2.17782e-06
Otu345	Otu431	0.186583	1.66115e-07	2.17782e-06
Otu379	Otu423	0.186256	0.002	0.0194598
Otu311	Otu393	0.185753	1.66115e-07	2.17782e-06
Otu376	Otu389	0.184948	0.002	0.0194598
Otu316	Otu353	0.182677	1.66115e-07	2.17782e-06
Otu332	Otu349	0.182599	0.002	0.0194598
Otu318	Otu433	0.181962	1.66115e-07	2.17782e-06
Otu313	Otu334	0.181661	1.66115e-07	2.17782e-06
Otu316	Otu385	0.179856	1.66115e-07	2.17782e-06
Otu345	Otu422	0.178949	0.002	0.0194598
Otu311	Otu419	0.178057	1.66115e-07	2.17782e-06
Otu312	Otu373	0.178056	1.66115e-07	2.17782e-06
Otu304	Otu446	0.176847	1.66115e-07	2.17782e-06
Otu316	Otu401	0.175179	0.004	0.0329693
Otu329	Otu415	0.174553	1.66115e-07	2.17782e-06
Otu358	Otu438	0.174227	1.66115e-07	2.17782e-06
Otu339	Otu432	0.17415	0.002	0.0194598
Otu358	Otu362	0.173716	1.66115e-07	2.17782e-06
Otu334	Otu414	0.173529	1.66115e-07	2.17782e-06
Otu349	Otu389	0.173315	0.002	0.0194598
Otu307	Otu380	0.17305	0.004	0.0329693
Otu329	Otu445	0.17195	0.006	0.0441253
Otu402	Otu427	0.171944	1.66115e-07	2.17782e-06
Otu314	Otu421	0.17134	1.66115e-07	2.17782e-06
Otu332	Otu407	0.171311	0.004	0.0329693
Otu306	Otu416	0.170883	1.66115e-07	2.17782e-06
Otu353	Otu379	0.170356	0.002	0.0194598
Otu354	Otu439	0.169776	0.004	0.0329693
Otu335	Otu435	0.169502	1.66115e-07	2.17782e-06
Otu353	Otu401	0.169156	1.66115e-07	2.17782e-06
Otu313	Otu318	0.169033	1.66115e-07	2.17782e-06
Otu426	Otu434	0.168822	1.66115e-07	2.17782e-06
Otu308	Otu313	0.16877	1.66115e-07	2.17782e-06
Otu350	Otu441	0.168001	1.66115e-07	2.17782e-06
Otu329	Otu424	0.167711	1.66115e-07	2.17782e-06
Otu345	Otu398	0.167195	1.66115e-07	2.17782e-06
Otu384	Otu401	0.167118	0.004	0.0329693
Otu316	Otu356	0.167091	0.006	0.0441253
Otu398	Otu437	0.166671	1.66115e-07	2.17782e-06
Otu307	Otu433	0.165979	0.002	0.0194598
Otu401	Otu407	0.165769	1.66115e-07	2.17782e-06
Otu311	Otu357	0.165638	0.002	0.0194598
Otu422	Otu448	0.165316	0.006	0.0441253
Otu359	Otu407	0.165265	0.002	0.0194598
Otu402	Otu435	0.164669	1.66115e-07	2.17782e-06
Otu384	Otu407	0.164327	0.006	0.0441253
Otu310	Otu358	0.164082	1.66115e-07	2.17782e-06
Otu358	Otu448	0.163842	1.66115e-07	2.17782e-06
Otu323	Otu421	0.163234	0.002	0.0194598
Otu311	Otu424	0.163008	0.002	0.0194598
Otu375	Otu428	0.162707	0.006	0.0441253
Otu316	Otu435	0.162601	1.66115e-07	2.17782e-06
Otu313	Otu416	0.162239	1.66115e-07	2.17782e-06
Otu435	Otu437	0.161582	1.66115e-07	2.17782e-06
Otu314	Otu358	0.161556	1.66115e-07	2.17782e-06
Otu394	Otu413	0.161255	1.66115e-07	2.17782e-06
Otu313	Otu402	0.16086	1.66115e-07	2.17782e-06
Otu318	Otu326	0.160841	0.006	0.0441253
Otu335	Otu388	0.160777	1.66115e-07	2.17782e-06
Otu423	Otu449	0.160708	0.006	0.0441253
Otu305	Otu388	0.160518	1.66115e-07	2.17782e-06
Otu413	Otu418	0.160431	1.66115e-07	2.17782e-06
Otu313	Otu433	0.160389	1.66115e-07	2.17782e-06
Otu358	Otu401	0.159629	0.002	0.0194598
Otu338	Otu424	0.159398	1.66115e-07	2.17782e-06
Otu350	Otu388	0.158807	1.66115e-07	2.17782e-06
Otu358	Otu435	0.158693	1.66115e-07	2.17782e-06
Otu379	Otu389	0.158264	0.004	0.0329693
Otu421	Otu441	0.15767	1.66115e-07	2.17782e-06
Otu385	Otu423	0.15748	0.002	0.0194598
Otu431	Otu433	0.157377	1.66115e-07	2.17782e-06
Otu368	Otu394	0.157281	0.006	0.0441253
Otu311	Otu359	0.157083	1.66115e-07	2.17782e-06
Otu318	Otu358	0.156727	0.002	0.0194598
Otu318	Otu359	0.156724	0.004	0.0329693
Otu353	Otu389	0.156624	0.004	0.0329693
Otu309	Otu431	0.156579	1.66115e-07	2.17782e-06
Otu312	Otu316	0.155929	0.004	0.0329693
Otu422	Otu423	0.155414	1.66115e-07	2.17782e-06
Otu334	Otu433	0.1553	0.004	0.0329693
Otu314	Otu394	0.155223	1.66115e-07	2.17782e-06
Otu345	Otu448	0.155132	0.002	0.0194598
Otu385	Otu402	0.155005	1.66115e-07	2.17782e-06
Otu352	Otu425	0.154919	0.002	0.0194598
Otu394	Otu423	0.154673	0.006	0.0441253
Otu316	Otu358	0.154264	0.004	0.0329693
Otu334	Otu435	0.154262	1.66115e-07	2.17782e-06
Otu431	Otu434	0.154256	0.002	0.0194598
Otu402	Otu443	0.153872	1.66115e-07	2.17782e-06
Otu389	Otu402	0.153673	1.66115e-07	2.17782e-06
Otu418	Otu437	0.153626	1.66115e-07	2.17782e-06
Otu305	Otu311	0.153616	1.66115e-07	2.17782e-06
Otu314	Otu332	0.153458	0.004	0.0329693
Otu313	Otu343	0.153246	0.006	0.0441253
Otu386	Otu425	0.152092	0.006	0.0441253
Otu350	Otu433	0.15197	0.004	0.0329693
Otu373	Otu418	0.151962	0.002	0.0194598
Otu413	Otu435	0.151899	1.66115e-07	2.17782e-06
Otu318	Otu330	0.151785	0.002	0.0194598
Otu311	Otu437	0.151654	1.66115e-07	2.17782e-06
Otu393	Otu422	0.151502	1.66115e-07	2.17782e-06
Otu362	Otu426	0.151458	0.004	0.0329693
Otu355	Otu424	0.150969	0.002	0.0194598
Otu391	Otu397	0.150787	0.006	0.0441253
Otu330	Otu429	0.150776	1.66115e-07	2.17782e-06
Otu310	Otu398	0.14994	1.66115e-07	2.17782e-06
Otu311	Otu345	0.149822	1.66115e-07	2.17782e-06
Otu418	Otu428	0.149798	1.66115e-07	2.17782e-06
Otu348	Otu350	0.149687	0.002	0.0194598
Otu416	Otu418	0.149482	1.66115e-07	2.17782e-06
Otu332	Otu417	0.149191	0.002	0.0194598
Otu335	Otu373	0.149046	0.002	0.0194598
Otu330	Otu413	0.148954	1.66115e-07	2.17782e-06
Otu350	Otu386	0.148699	0.004	0.0329693
Otu345	Otu358	0.148566	1.66115e-07	2.17782e-06
Otu386	Otu443	0.148515	0.004	0.0329693
Otu413	Otu422	0.148377	1.66115e-07	2.17782e-06
Otu311	Otu388	0.148249	1.66115e-07	2.17782e-06
Otu305	Otu412	0.148103	1.66115e-07	2.17782e-06
Otu305	Otu433	0.14804	1.66115e-07	2.17782e-06
Otu412	Otu425	0.148039	0.006	0.0441253
Otu393	Otu435	0.147844	1.66115e-07	2.17782e-06
Otu330	Otu375	0.147832	0.002	0.0194598
Otu318	Otu345	0.147696	1.66115e-07	2.17782e-06
Otu306	Otu312	0.147583	0.004	0.0329693
Otu308	Otu435	0.14751	1.66115e-07	2.17782e-06
Otu335	Otu431	0.147256	0.002	0.0194598
Otu308	Otu431	0.147203	1.66115e-07	2.17782e-06
Otu309	Otu414	0.147073	1.66115e-07	2.17782e-06
Otu358	Otu422	0.147033	0.002	0.0194598
Otu389	Otu431	0.146621	0.004	0.0329693
Otu413	Otu433	0.146562	1.66115e-07	2.17782e-06
Otu358	Otu394	0.145909	1.66115e-07	2.17782e-06
Otu306	Otu413	0.145812	0.002	0.0194598
Otu338	Otu446	0.145608	0.002	0.0194598
Otu338	Otu437	0.145452	0.002	0.0194598
Otu350	Otu394	0.145219	1.66115e-07	2.17782e-06
Otu404	Otu416	0.145094	0.002	0.0194598
Otu311	Otu433	0.145011	1.66115e-07	2.17782e-06
Otu334	Otu416	0.144958	1.66115e-07	2.17782e-06
Otu419	Otu435	0.14487	1.66115e-07	2.17782e-06
Otu386	Otu423	0.144834	0.006	0.0441253
Otu312	Otu394	0.144824	0.004	0.0329693
Otu394	Otu433	0.144385	0.004	0.0329693
Otu401	Otu423	0.144349	0.002	0.0194598
Otu309	Otu324	0.144125	0.002	0.0194598
Otu389	Otu423	0.144053	0.002	0.0194598
Otu313	Otu432	0.143942	0.004	0.0329693
Otu313	Otu358	0.143826	0.004	0.0329693
Otu334	Otu393	0.14382	1.66115e-07	2.17782e-06
Otu350	Otu437	0.143804	0.006	0.0441253
Otu359	Otu393	0.143657	0.004	0.0329693
Otu388	Otu431	0.143532	1.66115e-07	2.17782e-06
Otu357	Otu429	0.143487	0.002	0.0194598
Otu340	Otu402	0.143407	1.66115e-07	2.17782e-06
Otu414	Otu424	0.14334	1.66115e-07	2.17782e-06
Otu317	Otu441	0.143189	0.002	0.0194598
Otu398	Otu416	0.143177	0.002	0.0194598
Otu358	Otu416	0.143176	1.66115e-07	2.17782e-06
Otu405	Otu413	0.143016	0.002	0.0194598
Otu388	Otu423	0.143003	1.66115e-07	2.17782e-06
Otu389	Otu398	0.142611	0.004	0.0329693
Otu413	Otu416	0.142516	1.66115e-07	2.17782e-06
Otu350	Otu402	0.142513	1.66115e-07	2.17782e-06
Otu345	Otu427	0.142513	1.66115e-07	2.17782e-06
Otu310	Otu318	0.142442	0.002	0.0194598
Otu416	Otu435	0.142379	1.66115e-07	2.17782e-06
Otu306	Otu311	0.142304	0.002	0.0194598
Otu308	Otu311	0.142282	1.66115e-07	2.17782e-06
Otu352	Otu386	0.142278	0.002	0.0194598
Otu389	Otu437	0.14218	0.006	0.0441253
Otu324	Otu358	0.142175	0.002	0.0194598
Otu405	Otu416	0.142171	1.66115e-07	2.17782e-06
Otu313	Otu393	0.142108	1.66115e-07	2.17782e-06
Otu412	Otu428	0.141965	0.004	0.0329693
Otu413	Otu427	0.141878	1.66115e-07	2.17782e-06
Otu313	Otu389	0.14177	0.002	0.0194598
Otu323	Otu431	0.141517	1.66115e-07	2.17782e-06
Otu309	Otu311	0.141507	1.66115e-07	2.17782e-06
Otu352	Otu413	0.1415	1.66115e-07	2.17782e-06
Otu353	Otu388	0.141487	1.66115e-07	2.17782e-06
Otu394	Otu414	0.141464	1.66115e-07	2.17782e-06
Otu358	Otu388	0.141399	1.66115e-07	2.17782e-06
Otu358	Otu413	0.141287	1.66115e-07	2.17782e-06
Otu314	Otu324	0.141163	0.002	0.0194598
Otu358	Otu431	0.141107	1.66115e-07	2.17782e-06
Otu403	Otu407	0.140994	0.004	0.0329693
Otu349	Otu398	0.14099	0.002	0.0194598
Otu307	Otu318	0.140981	0.006	0.0441253
Otu313	Otu388	0.14088	1.66115e-07	2.17782e-06
Otu363	Otu385	0.140837	0.006	0.0441253
Otu418	Otu431	0.140734	1.66115e-07	2.17782e-06
Otu314	Otu402	0.140506	1.66115e-07	2.17782e-06
Otu305	Otu413	0.14041	1.66115e-07	2.17782e-06
Otu311	Otu443	0.140378	1.66115e-07	2.17782e-06
Otu311	Otu427	0.140337	0.002	0.0194598
Otu358	Otu433	0.140138	1.66115e-07	2.17782e-06
Otu316	Otu421	0.140095	0.006	0.0441253
Otu305	Otu416	0.139815	1.66115e-07	2.17782e-06
Otu398	Otu433	0.139811	0.002	0.0194598
Otu413	Otu419	0.139793	0.002	0.0194598
Otu313	Otu401	0.139716	0.002	0.0194598
Otu313	Otu352	0.139576	0.006	0.0441253
Otu318	Otu401	0.139336	1.66115e-07	2.17782e-06
Otu338	Otu441	0.139141	0.002	0.0194598
Otu362	Otu412	0.139098	0.002	0.0194598
Otu431	Otu441	0.139079	1.66115e-07	2.17782e-06
Otu318	Otu416	0.139012	1.66115e-07	2.17782e-06
Otu312	Otu388	0.139004	1.66115e-07	2.17782e-06
Otu350	Otu421	0.138966	0.002	0.0194598
Otu310	Otu413	0.138914	1.66115e-07	2.17782e-06
Otu311	Otu435	0.138898	1.66115e-07	2.17782e-06
Otu308	Otu335	0.138699	1.66115e-07	2.17782e-06
Otu305	Otu398	0.138359	1.66115e-07	2.17782e-06
Otu327	Otu435	0.138172	0.004	0.0329693
Otu313	Otu413	0.138156	0.002	0.0194598
Otu350	Otu358	0.138132	1.66115e-07	2.17782e-06
Otu398	Otu431	0.138081	1.66115e-07	2.17782e-06
Otu416	Otu428	0.138067	1.66115e-07	2.17782e-06
Otu352	Otu412	0.138025	0.002	0.0194598
Otu334	Otu429	0.137892	1.66115e-07	2.17782e-06
Otu313	Otu398	0.137708	1.66115e-07	2.17782e-06
Otu309	Otu329	0.13741	0.006	0.0441253
Otu437	Otu443	0.136951	0.002	0.0194598
Otu353	Otu385	0.136936	0.002	0.0194598
Otu340	Otu413	0.136907	0.002	0.0194598
Otu421	Otu448	0.136664	0.002	0.0194598
Otu412	Otu413	0.136599	1.66115e-07	2.17782e-06
Otu350	Otu449	0.136408	0.006	0.0441253
Otu352	Otu418	0.136144	0.006	0.0441253
Otu416	Otu437	0.136067	0.002	0.0194598
Otu309	Otu433	0.135604	0.004	0.0329693
Otu353	Otu398	0.135555	1.66115e-07	2.17782e-06
Otu305	Otu385	0.135323	1.66115e-07	2.17782e-06
Otu353	Otu423	0.134877	0.004	0.0329693
Otu386	Otu421	0.134862	0.006	0.0441253
Otu398	Otu402	0.134716	1.66115e-07	2.17782e-06
Otu334	Otu388	0.134648	1.66115e-07	2.17782e-06
Otu349	Otu402	0.134491	0.002	0.0194598
Otu402	Otu449	0.134471	0.002	0.0194598
Otu417	Otu431	0.134404	0.004	0.0329693
Otu421	Otu437	0.134383	0.004	0.0329693
Otu305	Otu401	0.134368	0.004	0.0329693
Otu431	Otu437	0.134289	0.002	0.0194598
Otu309	Otu435	0.134057	0.002	0.0194598
Otu353	Otu397	0.133954	1.66115e-07	2.17782e-06
Otu429	Otu445	0.133948	0.004	0.0329693
Otu311	Otu429	0.13394	0.002	0.0194598
Otu402	Otu434	0.13378	0.004	0.0329693
Otu352	Otu416	0.133721	1.66115e-07	2.17782e-06
Otu314	Otu343	0.133643	0.004	0.0329693
Otu327	Otu358	0.133632	0.004	0.0329693
Otu385	Otu433	0.133461	0.002	0.0194598
Otu402	Otu416	0.13325	1.66115e-07	2.17782e-06
Otu375	Otu413	0.133239	1.66115e-07	2.17782e-06
Otu313	Otu314	0.132907	0.002	0.0194598
Otu430	Otu437	0.132833	0.006	0.0441253
Otu407	Otu435	0.132697	1.66115e-07	2.17782e-06
Otu358	Otu449	0.132639	1.66115e-07	2.17782e-06
Otu414	Otu437	0.132436	1.66115e-07	2.17782e-06
Otu330	Otu386	0.132384	0.004	0.0329693
Otu401	Otu416	0.132361	0.002	0.0194598
Otu330	Otu416	0.13227	1.66115e-07	2.17782e-06
Otu310	Otu428	0.132255	0.004	0.0329693
Otu388	Otu429	0.132252	0.002	0.0194598
Otu402	Otu433	0.132163	1.66115e-07	2.17782e-06
Otu358	Otu429	0.132137	1.66115e-07	2.17782e-06
Otu334	Otu335	0.13174	0.004	0.0329693
Otu314	Otu350	0.131614	1.66115e-07	2.17782e-06
Otu385	Otu427	0.131589	0.002	0.0194598
Otu412	Otu414	0.131464	0.004	0.0329693
Otu318	Otu384	0.131173	0.006	0.0441253
Otu311	Otu362	0.13095	1.66115e-07	2.17782e-06
Otu407	Otu449	0.130786	1.66115e-07	2.17782e-06
Otu422	Otu429	0.130749	0.002	0.0194598
Otu309	Otu394	0.130555	1.66115e-07	2.17782e-06
Otu424	Otu429	0.130496	1.66115e-07	2.17782e-06
Otu334	Otu431	0.130363	0.004	0.0329693
Otu413	Otu421	0.130232	1.66115e-07	2.17782e-06
Otu345	Otu385	0.130103	0.006	0.0441253
Otu339	Otu413	0.129924	0.002	0.0194598
Otu352	Otu431	0.129543	0.002	0.0194598
Otu310	Otu345	0.129517	1.66115e-07	2.17782e-06
Otu407	Otu416	0.129146	1.66115e-07	2.17782e-06
Otu334	Otu402	0.129144	1.66115e-07	2.17782e-06
Otu388	Otu433	0.129123	1.66115e-07	2.17782e-06
Otu414	Otu429	0.129078	1.66115e-07	2.17782e-06
Otu398	Otu435	0.129031	1.66115e-07	2.17782e-06
Otu308	Otu358	0.128935	1.66115e-07	2.17782e-06
Otu354	Otu412	0.128877	0.004	0.0329693
Otu314	Otu427	0.128745	1.66115e-07	2.17782e-06
Otu311	Otu338	0.128677	1.66115e-07	2.17782e-06
Otu314	Otu435	0.128627	1.66115e-07	2.17782e-06
Otu345	Otu449	0.12849	0.004	0.0329693
Otu388	Otu438	0.128358	0.006	0.0441253
Otu388	Otu402	0.128207	1.66115e-07	2.17782e-06
Otu345	Otu412	0.127985	1.66115e-07	2.17782e-06
Otu386	Otu412	0.127712	0.004	0.0329693
Otu311	Otu358	0.127234	1.66115e-07	2.17782e-06
Otu413	Otu414	0.126786	1.66115e-07	2.17782e-06
Otu416	Otu427	0.126778	0.002	0.0194598
Otu340	Otu429	0.12675	0.004	0.0329693
Otu310	Otu441	0.126686	0.002	0.0194598
Otu386	Otu441	0.126672	1.66115e-07	2.17782e-06
Otu314	Otu426	0.126288	0.004	0.0329693
Otu310	Otu421	0.125514	0.002	0.0194598
Otu338	Otu413	0.12527	1.66115e-07	2.17782e-06
Otu414	Otu418	0.125079	0.004	0.0329693
Otu385	Otu388	0.125051	1.66115e-07	2.17782e-06
Otu414	Otu427	0.12502	1.66115e-07	2.17782e-06
Otu437	Otu441	0.124841	0.002	0.0194598
Otu394	Otu402	0.12448	0.004	0.0329693
Otu412	Otu427	0.124372	0.004	0.0329693
Otu311	Otu329	0.1242	0.002	0.0194598
Otu332	Otu358	0.124131	0.004	0.0329693
Otu314	Otu398	0.12392	1.66115e-07	2.17782e-06
Otu317	Otu402	0.123913	0.002	0.0194598
Otu356	Otu421	0.12388	0.004	0.0329693
Otu310	Otu386	0.123653	0.006	0.0441253
Otu388	Otu394	0.123641	0.002	0.0194598
Otu343	Otu385	0.123609	0.004	0.0329693
Otu416	Otu438	0.123557	0.002	0.0194598
Otu356	Otu403	0.12349	0.006	0.0441253
Otu305	Otu353	0.122767	0.006	0.0441253
Otu393	Otu416	0.122355	0.002	0.0194598
Otu330	Otu417	0.121954	0.002	0.0194598
Otu314	Otu388	0.121796	0.002	0.0194598
Otu306	Otu435	0.121719	0.002	0.0194598
Otu308	Otu416	0.121545	1.66115e-07	2.17782e-06
Otu430	Otu441	0.121542	0.002	0.0194598
Otu427	Otu430	0.121536	0.004	0.0329693
Otu305	Otu431	0.121421	0.006	0.0441253
Otu431	Otu432	0.121171	0.002	0.0194598
Otu416	Otu443	0.120955	0.002	0.0194598
Otu314	Otu431	0.120932	1.66115e-07	2.17782e-06
Otu393	Otu405	0.120874	0.006	0.0441253
Otu309	Otu313	0.120837	0.004	0.0329693
Otu345	Otu433	0.120677	0.004	0.0329693
Otu328	Otu402	0.120488	0.006	0.0441253
Otu394	Otu417	0.120453	0.006	0.0441253
Otu412	Otu418	0.120418	0.004	0.0329693
Otu318	Otu414	0.120082	0.004	0.0329693
Otu307	Otu402	0.120075	0.004	0.0329693
Otu414	Otu423	0.119979	0.006	0.0441253
Otu308	Otu437	0.119969	1.66115e-07	2.17782e-06
Otu304	Otu441	0.119934	0.006	0.0441253
Otu413	Otu441	0.119669	1.66115e-07	2.17782e-06
Otu314	Otu418	0.11953	0.004	0.0329693
Otu308	Otu314	0.119528	1.66115e-07	2.17782e-06
Otu308	Otu421	0.119263	0.002	0.0194598
Otu314	Otu349	0.119209	0.002	0.0194598
Otu398	Otu423	0.119076	0.006	0.0441253
Otu309	Otu402	0.118971	0.004	0.0329693
Otu334	Otu417	0.11892	0.004	0.0329693
Otu394	Otu443	0.118858	0.004	0.0329693
Otu350	Otu431	0.118844	0.002	0.0194598
Otu311	Otu402	0.118548	1.66115e-07	2.17782e-06
Otu311	Otu413	0.118391	1.66115e-07	2.17782e-06
Otu397	Otu431	0.118044	0.002	0.0194598
Otu313	Otu435	0.118022	1.66115e-07	2.17782e-06
Otu394	Otu427	0.117992	1.66115e-07	2.17782e-06
Otu314	Otu441	0.11796	1.66115e-07	2.17782e-06
Otu345	Otu429	0.117924	0.002	0.0194598
Otu309	Otu312	0.117423	0.006	0.0441253
Otu311	Otu350	0.117358	1.66115e-07	2.17782e-06
Otu305	Otu402	0.117069	1.66115e-07	2.17782e-06
Otu318	Otu427	0.116897	1.66115e-07	2.17782e-06
Otu314	Otu359	0.116876	0.006	0.0441253
Otu338	Otu358	0.116817	0.004	0.0329693
Otu308	Otu388	0.116725	1.66115e-07	2.17782e-06
Otu421	Otu429	0.116383	1.66115e-07	2.17782e-06
Otu318	Otu429	0.11627	0.002	0.0194598
Otu305	Otu345	0.116133	0.006	0.0441253
Otu393	Otu421	0.116102	0.006	0.0441253
Otu403	Otu435	0.115982	1.66115e-07	2.17782e-06
Otu308	Otu413	0.115838	1.66115e-07	2.17782e-06
Otu305	Otu441	0.115568	0.004	0.0329693
Otu311	Otu334	0.115332	0.006	0.0441253
Otu413	Otu417	0.115174	0.002	0.0194598
Otu358	Otu427	0.114714	0.002	0.0194598
Otu345	Otu393	0.114645	1.66115e-07	2.17782e-06
Otu416	Otu422	0.114608	0.004	0.0329693
Otu402	Otu414	0.114544	1.66115e-07	2.17782e-06
Otu311	Otu421	0.114495	0.004	0.0329693
Otu314	Otu413	0.114141	1.66115e-07	2.17782e-06
Otu308	Otu398	0.114126	0.004	0.0329693
Otu335	Otu429	0.114013	1.66115e-07	2.17782e-06
Otu429	Otu433	0.113553	0.006	0.0441253
Otu311	Otu431	0.113503	0.002	0.0194598
Otu421	Otu424	0.113479	0.004	0.0329693
Otu388	Otu397	0.113437	0.002	0.0194598
Otu388	Otu389	0.113385	0.002	0.0194598
Otu305	Otu309	0.113296	0.006	0.0441253
Otu335	Otu345	0.113273	1.66115e-07	2.17782e-06
Otu311	Otu314	0.113262	1.66115e-07	2.17782e-06
Otu350	Otu412	0.113218	0.002	0.0194598
Otu312	Otu435	0.11308	1.66115e-07	2.17782e-06
Otu308	Otu394	0.112685	0.006	0.0441253
Otu425	Otu431	0.112641	0.006	0.0441253
Otu358	Otu402	0.112596	0.002	0.0194598
Otu314	Otu316	0.112528	0.004	0.0329693
Otu353	Otu435	0.112497	1.66115e-07	2.17782e-06
Otu309	Otu314	0.112495	0.002	0.0194598
Otu311	Otu414	0.112339	0.002	0.0194598
Otu312	Otu414	0.112031	0.006	0.0441253
Otu312	Otu314	0.111739	0.002	0.0194598
Otu308	Otu362	0.11155	1.66115e-07	2.17782e-06
Otu425	Otu427	0.111353	0.006	0.0441253
Otu393	Otu429	0.111032	0.002	0.0194598
Otu308	Otu414	0.110965	0.002	0.0194598
Otu308	Otu345	0.110769	0.002	0.0194598
Otu309	Otu358	0.110612	0.002	0.0194598
Otu393	Otu449	0.109776	0.006	0.0441253
Otu369	Otu416	0.109474	1.66115e-07	2.17782e-06
Otu388	Otu443	0.108932	0.002	0.0194598
Otu313	Otu429	0.108772	0.006	0.0441253
Otu358	Otu412	0.108757	0.004	0.0329693
Otu401	Otu402	0.108631	0.002	0.0194598
Otu413	Otu428	0.108598	0.006	0.0441253
Otu416	Otu419	0.108357	0.004	0.0329693
Otu308	Otu309	0.108333	1.66115e-07	2.17782e-06
Otu388	Otu416	0.108019	0.004	0.0329693
Otu358	Otu407	0.107887	0.002	0.0194598
Otu310	Otu311	0.10784	0.002	0.0194598
Otu358	Otu398	0.107752	0.004	0.0329693
Otu312	Otu429	0.107551	0.006	0.0441253
Otu388	Otu435	0.107461	1.66115e-07	2.17782e-06
Otu345	Otu397	0.107254	0.002	0.0194598
Otu352	Otu398	0.107215	0.004	0.0329693
Otu427	Otu435	0.106955	1.66115e-07	2.17782e-06
Otu350	Otu416	0.106924	0.002	0.0194598
Otu345	Otu413	0.106824	0.006	0.0441253
Otu308	Otu338	0.106752	0.004	0.0329693
Otu427	Otu431	0.106742	0.004	0.0329693
Otu308	Otu385	0.106715	0.004	0.0329693
Otu308	Otu433	0.106646	0.006	0.0441253
Otu388	Otu427	0.106277	0.002	0.0194598
Otu335	Otu414	0.106144	0.006	0.0441253
Otu310	Otu427	0.106129	0.006	0.0441253
Otu407	Otu431	0.105885	0.004	0.0329693
Otu358	Otu421	0.105848	0.004	0.0329693
Otu312	Otu412	0.105818	0.006	0.0441253
Otu307	Otu308	0.10566	0.006	0.0441253
Otu314	Otu429	0.10558	0.006	0.0441253
Otu308	Otu429	0.105558	1.66115e-07	2.17782e-06
Otu335	Otu413	0.105208	0.002	0.0194598
Otu398	Otu427	0.105191	0.002	0.0194598
Otu435	Otu441	0.104723	1.66115e-07	2.17782e-06
Otu314	Otu403	0.104395	0.004	0.0329693
Otu330	Otu412	0.104349	0.006	0.0441253
Otu388	Otu426	0.103938	0.004	0.0329693
Otu402	Otu413	0.10326	1.66115e-07	2.17782e-06
Otu317	Otu435	0.103192	0.002	0.0194598
Otu407	Otu413	0.102415	0.006	0.0441253
Otu373	Otu435	0.101917	0.004	0.0329693
Otu418	Otu435	0.100822	0.006	0.0441253
Otu345	Otu388	0.100724	0.006	0.0441253
Otu388	Otu398	0.100555	0.004	0.0329693
Otu345	Otu350	0.100517	0.004	0.0329693
Otu330	Otu402	0.099188	0.006	0.0441253
Otu414	Otu416	0.098977	0.006	0.0441253
Otu345	Otu435	0.098856	0.002	0.0194598
Otu402	Otu407	0.098483	0.006	0.0441253
Otu312	Otu335	0.096946	0.006	0.0441253
Otu308	Otu412	0.087119	0.006	0.0441253
Otu361	Otu435	-0.087515	0.004	0.0329693
Otu308	Otu390	-0.106407	0.006	0.0441253
Otu308	Otu325	-0.106977	1.66115e-07	2.17782e-06
Otu387	Otu388	-0.107413	0.002	0.0194598
Otu431	Otu436	-0.109667	0.006	0.0441253
Otu365	Otu388	-0.109754	0.004	0.0329693
Otu346	Otu402	-0.109772	0.006	0.0441253
Otu344	Otu388	-0.110901	0.006	0.0441253
Otu353	Otu415	-0.115035	0.006	0.0441253
Otu333	Otu416	-0.116307	1.66115e-07	2.17782e-06
Otu345	Otu395	-0.118908	0.006	0.0441253
Otu322	Otu429	-0.120323	0.002	0.0194598
Otu387	Otu431	-0.122473	0.002	0.0194598
Otu322	Otu388	-0.124814	1.66115e-07	2.17782e-06
Otu390	Otu435	-0.125288	0.002	0.0194598
Otu333	Otu429	-0.126924	0.004	0.0329693
Otu315	Otu358	-0.127902	0.002	0.0194598
Otu335	Otu367	-0.128004	0.004	0.0329693
Otu311	Otu344	-0.128775	0.004	0.0329693
Otu358	Otu374	-0.13006	1.66115e-07	2.17782e-06
Otu358	Otu390	-0.13103	0.002	0.0194598
Otu335	Otu372	-0.13195	1.66115e-07	2.17782e-06
Otu346	Otu441	-0.132327	0.004	0.0329693
Otu344	Otu429	-0.134299	1.66115e-07	2.17782e-06
Otu402	Otu440	-0.135348	0.006	0.0441253
Otu326	Otu403	-0.137049	0.006	0.0441253
Otu387	Otu435	-0.13773	1.66115e-07	2.17782e-06
Otu395	Otu435	-0.139078	1.66115e-07	2.17782e-06
Otu320	Otu414	-0.139863	1.66115e-07	2.17782e-06
Otu305	Otu440	-0.140999	0.004	0.0329693
Otu311	Otu366	-0.143987	1.66115e-07	2.17782e-06
Otu367	Otu412	-0.144185	0.002	0.0194598
Otu305	Otu337	-0.144264	0.004	0.0329693
Otu364	Otu388	-0.144343	1.66115e-07	2.17782e-06
Otu361	Otu431	-0.144369	0.004	0.0329693
Otu437	Otu452	-0.144789	0.004	0.0329693
Otu326	Otu353	-0.147997	1.66115e-07	2.17782e-06
Otu395	Otu413	-0.14811	0.002	0.0194598
Otu361	Otu402	-0.148302	1.66115e-07	2.17782e-06
Otu376	Otu403	-0.148411	0.004	0.0329693
Otu305	Otu396	-0.151451	0.006	0.0441253
Otu361	Otu412	-0.153501	0.004	0.0329693
Otu358	Otu366	-0.154285	0.006	0.0441253
Otu333	Otu388	-0.155785	1.66115e-07	2.17782e-06
Otu348	Otu379	-0.1573	0.004	0.0329693
Otu381	Otu407	-0.158554	1.66115e-07	2.17782e-06
Otu325	Otu415	-0.160018	0.006	0.0441253
Otu395	Otu429	-0.161833	0.002	0.0194598
Otu305	Otu361	-0.162366	1.66115e-07	2.17782e-06
Otu361	Otu437	-0.166288	0.002	0.0194598
Otu359	Otu423	-0.168789	0.006	0.0441253
Otu366	Otu431	-0.16955	0.004	0.0329693
Otu352	Otu367	-0.173065	0.002	0.0194598
Otu309	Otu366	-0.174107	1.66115e-07	2.17782e-06
Otu313	Otu361	-0.177313	0.006	0.0441253
Otu360	Otu401	-0.179208	0.006	0.0441253
Otu313	Otu344	-0.182561	0.006	0.0441253
Otu365	Otu425	-0.185143	0.006	0.0441253
Otu338	Otu382	-0.185479	1.66115e-07	2.17782e-06
Otu322	Otu423	-0.186273	0.002	0.0194598
Otu334	Otu344	-0.190939	1.66115e-07	2.17782e-06
Otu313	Otu396	-0.191146	0.004	0.0329693
Otu361	Otu433	-0.194033	0.006	0.0441253
Otu333	Otu343	-0.194482	0.006	0.0441253
Otu322	Otu389	-0.194669	0.006	0.0441253
Otu362	Otu366	-0.196112	0.006	0.0441253
Otu313	Otu366	-0.19735	0.004	0.0329693
Otu352	Otu366	-0.199937	0.004	0.0329693
Otu396	Otu448	-0.200651	0.006	0.0441253
Otu325	Otu377	-0.200848	0.006	0.0441253
Otu362	Otu390	-0.20242	0.006	0.0441253
Otu325	Otu443	-0.20299	0.004	0.0329693
Otu307	Otu442	-0.203165	1.66115e-07	2.17782e-06
Otu346	Otu380	-0.207471	0.004	0.0329693
Otu390	Otu448	-0.211201	0.006	0.0441253
Otu327	Otu368	-0.216325	0.006	0.0441253
Otu315	Otu352	-0.216646	0.002	0.0194598
Otu366	Otu434	-0.218438	0.002	0.0194598
Otu324	Otu396	-0.221709	0.006	0.0441253
Otu315	Otu323	-0.223177	0.004	0.0329693
Otu307	Otu440	-0.226737	0.002	0.0194598
Otu371	Otu425	-0.238018	1.66115e-07	2.17782e-06
Otu307	Otu361	-0.240448	0.002	0.0194598
Otu327	Otu377	-0.240971	0.002	0.0194598
Otu316	Otu390	-0.240974	0.002	0.0194598
Otu315	Otu324	-0.246865	0.006	0.0441253
Otu336	Otu363	-0.250248	0.004	0.0329693
Otu320	Otu374	-0.252546	0.006	0.0441253
Otu344	Otu437	-0.253322	1.66115e-07	2.17782e-06
Otu307	Otu344	-0.254402	1.66115e-07	2.17782e-06
Otu307	Otu366	-0.261033	1.66115e-07	2.17782e-06
Otu315	Otu316	-0.265522	1.66115e-07	2.17782e-06
Otu306	Otu364	-0.267553	0.006	0.0441253
Otu374	Otu405	-0.269556	1.66115e-07	2.17782e-06
Otu366	Otu433	-0.272025	1.66115e-07	2.17782e-06
Otu328	Otu390	-0.32309	0.002	0.0194598
